# Supplementary material
Source: ML conference proceedings conference paper supplement (https://proceedings.neurips.cc/paper_files/paper/2018/hash/2a38a4a9316c49e5a833517c45d31070-Abstract.html)
Supplement: Supplementary file [file 2a38a4a9316c49e5a833517c45d31070-Supplemental.zip]

## A Proof of Main Theorem

**Theorem 1** Under Assumptions 1-6, for a randomly sampled  $\mathbf{x}, \mathbf{y}$ , with high probability

$$|L_p(\mathbf{W}_p \mathbf{F}_m \mathbf{x}, \mathbf{y}) - L_p(\mathbf{W}_p \mathbf{F} \mathbf{x}, \mathbf{y})| \leq \frac{a(\sigma_r + \sigma_p)n\sigma_p}{ct} \left( r + \sqrt{r^2 + \frac{4\epsilon c B_{\mathbf{W}_r} B_{\mathbf{F}} r}{a(\sigma_r + \sigma_p)n}} \right) + \frac{2\epsilon\sigma_p B_{\mathbf{W}_r} B_{\mathbf{F}}}{t} \quad (6)$$

**Proof:** From Assumption 4,

$$|L_p(\mathbf{W}_p \mathbf{F}_m \mathbf{x}, \mathbf{y}_p) - L_p(\mathbf{W}_p \mathbf{F} \mathbf{x}, \mathbf{y}_p)| \leq \sigma_p \|\mathbf{W}_r (\mathbf{F}_m - \mathbf{F}) \mathbf{x}\|_2$$

The key to bounding this value for an arbitrary  $(\mathbf{x}, \mathbf{y})$  is to first upper bound it in terms of the representative points,  $\sum_{i=1}^n \|\mathbf{W}_r (\mathbf{F}_m - \mathbf{F}) \mathbf{b}_i\|_2$ , and then provide an upper bound on this term with representative points.

**Part 1: Upper bound in terms of representative points** According to Assumption 5, for all  $\mathbf{x}$ , w.h.p.

$$\|\mathbf{W}_r (\mathbf{F}_m - \mathbf{F}) \mathbf{x}\|_2 = \left\| \sum_{j=1}^n \alpha_j \mathbf{W}_r (\mathbf{F}_m - \mathbf{F}) \mathbf{b}_j + \mathbf{W}_r (\mathbf{F}_m - \mathbf{F}) \boldsymbol{\eta} \right\|_2 \quad (7)$$

Using Cauchy-Schwarz, we further obtain

$$\begin{aligned} (7) &\leq \sqrt{\sum_{j=1}^n \alpha_j^2} \sqrt{\sum_{j=1}^n \|\mathbf{W}_r (\mathbf{F}_m - \mathbf{F}) \mathbf{b}_j\|_2^2} + \|\mathbf{W}_r (\mathbf{F}_m - \mathbf{F})\|_2 \|\boldsymbol{\eta}\|_2 \\ &\leq \sqrt{r} \sqrt{\sum_{j=1}^n \|\mathbf{W}_r (\mathbf{F}_m - \mathbf{F}) \mathbf{b}_j\|_2^2} + \frac{2B_{\mathbf{W}_r} B_{\mathbf{F}} \epsilon}{t} \end{aligned} \quad (8)$$

**Part 2: Bounding  $A = \sqrt{\sum_{j=1}^n \|\mathbf{W}_r (\mathbf{F}_m - \mathbf{F}) \mathbf{b}_j\|_2^2}$**

Let  $B_L(\mathbf{F}_m \| \mathbf{F})$  denote the Bregman divergence,

$$B_L(\mathbf{F}_m \| \mathbf{F}) = L(\mathbf{F}_m) - L(\mathbf{F}) - \langle \mathbf{F}_m - \mathbf{F}, \nabla L(\mathbf{F}) \rangle \quad (9)$$

where the dot-product notation for the matrices corresponds to element-wise product and summation. We use the following two bounds, proved below.

$$B_N(\mathbf{F}_m \| \mathbf{F}) \leq B_L(\mathbf{F}_m \| \mathbf{F}) \quad (10)$$

$$B_N(\mathbf{F} \| \mathbf{F}_m) \leq B_{L_m}(\mathbf{F} \| \mathbf{F}_m) \quad (11)$$

$$B_{N_b}(\mathbf{F}_m \| \mathbf{F}) + B_{N_b}(\mathbf{F} \| \mathbf{F}_m) \leq a[B_N(\mathbf{F}_m \| \mathbf{F}) + B_N(\mathbf{F} \| \mathbf{F}_m)] \quad (12)$$

**Obtaining inequalities in (10) and (11)** The first term comes from the fact that  $L - N$  is strictly convex. This is because the sum of strictly convex functions for  $N$  are a strict subset of sum of strictly convex functions for  $L$ . Since  $L - N$  is still strictly convex, it provides a valid potential for the Bregman divergence and gives

$$0 \leq B_{L-N}(\mathbf{F}_m \| \mathbf{F}) = B_L(\mathbf{F}_m \| \mathbf{F}) - B_N(\mathbf{F}_m \| \mathbf{F}) \implies B_L(\mathbf{F}_m \| \mathbf{F}) \geq B_N(\mathbf{F}_m \| \mathbf{F}).$$

The same reasoning applies to  $B_{L_m}(\mathbf{F} \| \mathbf{F}_m) \geq B_N(\mathbf{F} \| \mathbf{F}_m)$ .

**Obtaining inequality in (12)** The second term follows from Assumption 6. Notice that the Bregman divergence for  $N_b$  and  $N$  simplifies as follows.

$$\begin{aligned} B_{N_b}(\mathbf{F}_m \| \mathbf{F}) + B_{N_b}(\mathbf{F} \| \mathbf{F}_m) &= N_b(\mathbf{F}_m) - N_b(\mathbf{F}) - \langle \mathbf{F}_m - \mathbf{F}, \nabla N_b(\mathbf{F}) \rangle + N_b(\mathbf{F}) - N_b(\mathbf{F}_m) - \langle \mathbf{F} - \mathbf{F}_m, \nabla N_b(\mathbf{F}_m) \rangle \\ &= \langle \mathbf{F}_m - \mathbf{F}, \nabla N_b(\mathbf{F}_m) - \nabla N_b(\mathbf{F}) \rangle \end{aligned}$$

By the definition of directional derivatives,

$$\langle \mathbf{F}_m - \mathbf{F}, \nabla N_b(\mathbf{F}) \rangle = \lim_{\alpha \rightarrow 0} \frac{N_b(\mathbf{F} + \alpha(\mathbf{F}_m - \mathbf{F})) - N_b(\mathbf{F})}{\alpha} = \lim_{\alpha \rightarrow 0} \frac{N_b((1 - \alpha)\mathbf{F} + \alpha\mathbf{F}_m) - N_b(\mathbf{F})}{\alpha}$$

and so, because both limits exists,

$$\begin{aligned} & \langle \mathbf{F}_m - \mathbf{F}, \nabla N_b(\mathbf{F}_m) - \nabla N_b(\mathbf{F}) \rangle \\ &= -\langle \mathbf{F}_m - \mathbf{F}, \nabla N_b(\mathbf{F}) \rangle - \langle \mathbf{F} - \mathbf{F}_m, \nabla N_b(\mathbf{F}_m) \rangle \\ &= \lim_{\alpha \rightarrow 0^+} \left[ \frac{N_b(\mathbf{F}) - N_b((1 - \alpha)\mathbf{F} + \alpha\mathbf{F}_m)}{\alpha} + \frac{N_b(\mathbf{F}_m) - N_b((1 - \alpha)\mathbf{F}_m + \alpha\mathbf{F})}{\alpha} \right] \\ &\leq \lim_{\alpha \rightarrow 0^+} a \left[ \frac{N(\mathbf{F}) - N((1 - \alpha)\mathbf{F} + \alpha\mathbf{F}_m)}{\alpha} + \frac{N(\mathbf{F}_m) - N((1 - \alpha)\mathbf{F}_m + \alpha\mathbf{F})}{\alpha} \right] \\ &= a \langle \mathbf{F}_m - \mathbf{F}, \nabla N(\mathbf{F}_m) - \nabla N(\mathbf{F}) \rangle \\ &= a [B_N(\mathbf{F}_m || \mathbf{F}) + B_N(\mathbf{F} || \mathbf{F}_m)] \end{aligned}$$

where the inequality follows from Assumption 6.

### Bounding $A$ using (10) - (12) and Assumptions 2 and 3

$$\begin{aligned} & a [B_L(\mathbf{F}_m || \mathbf{F}) + B_{L_m}(\mathbf{F} || \mathbf{F}_m)] \\ & \geq B_{N_b}(\mathbf{F}_m || \mathbf{F}) + B_{N_b}(\mathbf{F} || \mathbf{F}_m) \\ &= \frac{1}{n} \sum_{i=1}^n \langle \mathbf{F} - \mathbf{F}_m, \mathbf{W}_r^\top \nabla L_r(\mathbf{W}_r \mathbf{F} \mathbf{b}_i, \mathbf{y}_{r,b_i}) \mathbf{b}_i^\top \rangle - \frac{1}{n} \sum_{i=1}^n \langle \mathbf{F} - \mathbf{F}_m, \mathbf{W}_r^\top \nabla L_r(\mathbf{W}_r \mathbf{F}_m \mathbf{b}_i, \mathbf{y}_{r,b_i}) \mathbf{b}_i^\top \rangle \\ &= \frac{1}{n} \sum_{i=1}^n \left\langle \mathbf{W}_r (\mathbf{F} - \mathbf{F}_m) \mathbf{b}_i, \nabla L_r(\mathbf{W}_r \mathbf{F} \mathbf{b}_i, \mathbf{y}_{r,b_i}) - \nabla L_r(\mathbf{W}_r \mathbf{F}_m \mathbf{b}_i, \mathbf{y}_{r,b_i}) \right\rangle \\ &\geq \frac{c}{n} \sum_{i=1}^n \|\mathbf{W}_r (\mathbf{F}_m - \mathbf{F}) \mathbf{b}_i\|_2^2 \end{aligned}$$

where the inequality comes from the assumption that function  $L_r$  is  $c$ -strongly convex.

Notice now that, because  $\nabla L(\mathbf{F}) = \mathbf{0}$  and  $\nabla L_m(\mathbf{F}_m) = \mathbf{0}$

$$\begin{aligned} & B_L(\mathbf{F}_m || \mathbf{F}) + B_{L_m}(\mathbf{F} || \mathbf{F}_m) \\ &= L(\mathbf{F}_m) - L(\mathbf{F}) + L_m(\mathbf{F}) - L_m(\mathbf{F}_m) \\ &= (L(\mathbf{F}_m) - L_m(\mathbf{F}_m)) + (L_m(\mathbf{F}) - L(\mathbf{F})) \\ &= \frac{1}{t} [L_p(\mathbf{W}_p \mathbf{F}_m \mathbf{x}_m, \mathbf{y}_{p,m}) - L_p(\mathbf{W}_p \mathbf{F}_m \mathbf{x}'_m, \mathbf{y}'_{p,m})] \\ &\quad + \frac{1}{t} [L_r(\mathbf{W}_r \mathbf{F}_m \mathbf{x}_m, \mathbf{y}_{r,m}) - L_r(\mathbf{W}_r \mathbf{F}_m \mathbf{x}'_m, \mathbf{y}'_{r,m})] \\ &\quad + \frac{1}{t} [-L_p(\mathbf{W}_p \mathbf{F} \mathbf{x}_m, \mathbf{y}_{p,m}) + L_p(\mathbf{W}_p \mathbf{F} \mathbf{x}'_m, \mathbf{y}'_{p,m})] \\ &\quad + \frac{1}{t} [-L_r(\mathbf{W}_r \mathbf{F} \mathbf{x}_m, \mathbf{y}_{r,m}) + L_r(\mathbf{W}_r \mathbf{F} \mathbf{x}'_m, \mathbf{y}'_{r,m})] \end{aligned} \tag{13}$$

Because  $L_r$  is  $\sigma_r$ -admissible by Assumption 2, we have

$$|L_r(\mathbf{W}_r \mathbf{F}_m \mathbf{x}_m, \mathbf{y}_{r,m}) - L_r(\mathbf{W}_r \mathbf{F} \mathbf{x}_m, \mathbf{y}_{r,m})| \leq \sigma_r \|\mathbf{W}_r (\mathbf{F}_m - \mathbf{F}) \mathbf{x}_m\|_2.$$

We get a similar result for  $L_p$ , using Assumption 4, but with  $\sigma_p$ . Therefore, we can bound (13) above, and get

$$\frac{c}{n} \sum_{i=1}^n \|\mathbf{W}_r (\mathbf{F}_m - \mathbf{F}) \mathbf{b}_i\|_2^2 \leq \frac{a(\sigma_r + \sigma_p)}{t} [\|\mathbf{W}_r (\mathbf{F}_m - \mathbf{F}) \mathbf{x}_m\|_2 + \|\mathbf{W}_r (\mathbf{F}_m - \mathbf{F}) \mathbf{x}'_m\|_2] \tag{14}$$

**Putting it all together to get the upper bound on  $A$**  From (14), we get

$$\begin{aligned} \frac{c}{n} A^2 &\leq \frac{2a(\sigma_r + \sigma_p)}{t} \left( \sqrt{r} A + \frac{2B_{\mathbf{W}_r} B_{\mathbf{F}} \epsilon}{t} \right) \\ \implies A &\leq \frac{a(\sigma_r + \sigma_p)n}{ct} \left( \sqrt{r} + \sqrt{r + \frac{4\epsilon c B_{\mathbf{W}_r} B_{\mathbf{F}}}{a(\sigma_r + \sigma_p)n}} \right) \end{aligned} \tag{15}$$

Finally, therefore, again using (8),

$$\begin{aligned}
& |L_p(\mathbf{W}_p \mathbf{F}_m \mathbf{x}, \mathbf{y}_p) - L_p(\mathbf{W}_p \mathbf{F} \mathbf{x}, \mathbf{y}_p)| \\
& \leq \sigma_p \|\mathbf{W}_r (\mathbf{F}_m - \mathbf{F}) \mathbf{x}\|_2 \\
& \leq \sigma_p \sqrt{r} \sqrt{\sum_{j=1}^n \|\mathbf{W}_r (\mathbf{F}_m - \mathbf{F}) \mathbf{b}_j\|_2^2} + \sigma_p \frac{2B_{\mathbf{W}_r} B_{\mathbf{F}} \epsilon}{t} \\
& \leq \frac{a(\sigma_r + \sigma_p) n \sigma_p}{ct} \left( r + \sqrt{r^2 + \frac{4\epsilon c B_{\mathbf{W}_r} B_{\mathbf{F}} r}{a(\sigma_r + \sigma_p) n}} \right) + \frac{2\epsilon \sigma_p B_{\mathbf{W}_r} B_{\mathbf{F}}}{t}
\end{aligned}$$

■

## B Examples of specific constants for the Main Theorem

**Corollary 1** *In Assumption 4, if  $\mathbf{W}_p \in \mathbb{R}^{m \times k}$ ,  $\mathbf{W}_r \in \mathbb{R}^{d \times k}$ ,  $d \geq k \geq m$ ,  $\mathbf{W}_r$  is full rank,  $L_p$  is  $\sigma$ -admissible, then for  $\mathbf{W}_r^{-1}$  the inverse matrix of the first  $k$  rows of  $\mathbf{W}_r$ ,  $\sigma_p = \sigma \|\mathbf{W}_p\|_F \|\mathbf{W}_r^{-1}\|_F$ .*

**Proof:** Since  $\mathbf{W}_r$  is full rank, we must have  $\mathbf{W}_p = \mathbf{A} \mathbf{W}_r$ , where the last  $d - k$  columns of  $\mathbf{A}$  are all zeros. Hence  $\|\mathbf{W}_p (\mathbf{F} - \mathbf{F}_m) \mathbf{x}\|_2 \leq \|\mathbf{A}\|_F \|\mathbf{W}_r (\mathbf{F} - \mathbf{F}_m) \mathbf{x}\|_2$ . In the meanwhile,  $\|\mathbf{W}_p \mathbf{W}_r^{-1}\|_F = \|\mathbf{A} \mathbf{W}_r \mathbf{W}_r^{-1}\|_F = \|\mathbf{A}\|_F$ , where  $\mathbf{W}_r^{-1}$  is the inverse matrix of the first  $k$  rows of  $\mathbf{W}_r$ . Hence  $\|\mathbf{A}\|_F \leq \|\mathbf{W}_p\|_F \|\mathbf{W}_r^{-1}\|_F$ . It implies  $\sigma_p = \sigma \|\mathbf{W}_p\|_F \|\mathbf{W}_r^{-1}\|_F$ , since

$$\begin{aligned}
& |L_p(\mathbf{W}_p \mathbf{F}_m \mathbf{x}, \mathbf{y}_p) - L_p(\mathbf{W}_p \mathbf{F} \mathbf{x}, \mathbf{y}_p)| \\
& \leq \sigma \|\mathbf{W}_p (\mathbf{F}_m - \mathbf{F}) \mathbf{x}\|_2 \\
& \leq \sigma \|\mathbf{W}_p\|_F \|\mathbf{W}_r^{-1}\|_F \|\mathbf{W}_r (\mathbf{F} - \mathbf{F}_m) \mathbf{x}\|_2.
\end{aligned}$$

■

**Corollary 2** *For  $L_r$  the least-squares loss,*

$$c = 2 \quad \text{and} \quad \sigma_r = 2B_{\mathbf{W}_r} B_{\mathbf{F}} B_{\mathbf{x}} + 2B_{\mathbf{x}}.$$

*If  $L_p$  is*

1. *the least-squares loss, then  $\sigma = 2B_{\mathbf{W}_p} B_{\mathbf{F}} B_{\mathbf{x}} + 2B_{\mathbf{y}}$*
2. *the cross-entropy, with  $\mathbf{y}_p \in \{0, 1\}^m$ , then  $\sigma = 2\sqrt{m}$*
3. *the cross-entropy, with  $\mathbf{y}_p \in \{-1, 1\}^m$ , then  $\sigma = \sqrt{m}$ .*

**Proof:** For the least-squares loss  $L_r$ , we get  $c = 2$  because

$$\begin{aligned}
& \langle \mathbf{x}_1 - \mathbf{x}_2, \nabla L_r(\mathbf{x}_1, \mathbf{y}) - \nabla L_r(\mathbf{x}_2, \mathbf{y}) \rangle \\
& = \langle \mathbf{x}_1 - \mathbf{x}_2, 2(\mathbf{x}_1 - \mathbf{x}_2) \rangle \\
& \geq 2\|\mathbf{x}_1 - \mathbf{x}_2\|_2^2.
\end{aligned}$$

We get  $\sigma_r = 2B_{\mathbf{W}_r} B_{\mathbf{F}} B_{\mathbf{x}} + 2B_{\mathbf{x}}$  because

$$\begin{aligned}
& |L_r(\mathbf{W}_r \mathbf{F}_1 \mathbf{x}, \mathbf{y}_r) - L_r(\mathbf{W}_r \mathbf{F}_2 \mathbf{x}, \mathbf{y}_r)| \\
& = \left| \|\mathbf{W}_r \mathbf{F}_1 \mathbf{x} - \mathbf{y}_r\|_2^2 - \|\mathbf{W}_r \mathbf{F}_2 \mathbf{x} - \mathbf{y}_r\|_2^2 \right| \\
& = |\langle \mathbf{W}_r (\mathbf{F}_1 - \mathbf{F}_2) \mathbf{x}, \mathbf{W}_r \mathbf{F}_1 \mathbf{x} + \mathbf{W}_r \mathbf{F}_2 \mathbf{x} - 2\mathbf{y}_r \rangle| \\
& \leq \|\mathbf{W}_r (\mathbf{F}_1 - \mathbf{F}_2) \mathbf{x}\|_2 \|\mathbf{W}_r \mathbf{F}_1 \mathbf{x} + \mathbf{W}_r \mathbf{F}_2 \mathbf{x} - 2\mathbf{y}_r\|_2 \\
& \leq (2B_{\mathbf{W}_r} B_{\mathbf{F}} B_{\mathbf{x}} + 2B_{\mathbf{x}}) \|\mathbf{W}_r (\mathbf{F}_1 - \mathbf{F}_2) \mathbf{x}\|_2
\end{aligned}$$

Similarly, for  $L_p$  the least-squares loss,  $\sigma = 2B_{\mathbf{W}_p} B_{\mathbf{F}} B_{\mathbf{x}} + 2B_{\mathbf{y}}$ .

For the case where  $L_p$  is the cross-entropy loss, let

$$\begin{aligned}
\mathbf{z} &= \mathbf{W}_p \mathbf{F}_1 \mathbf{x} \\
\mathbf{z}' &= \mathbf{W}_p \mathbf{F}_2 \mathbf{x} \\
\mathbf{y} &= \mathbf{y}_p
\end{aligned}$$

with  $\mathbf{a}_i$  denoting the  $i$ -th element of vector  $\mathbf{a}$ . When  $\mathbf{y} \in \{0, 1\}^m$ ,

$$\begin{aligned}
& |L_p(\mathbf{z}, \mathbf{y}) - L_p(\mathbf{z}', \mathbf{y})| \\
&= \left| \sum_i^m \left[ -\mathbf{y}_i \ln \frac{1}{1 + \exp^{-\mathbf{z}_i}} - (1 - \mathbf{y}_i) \ln \frac{1}{1 + \exp^{\mathbf{z}_i}} \right. \right. \\
&\quad \left. \left. + \mathbf{y}_i \ln \frac{1}{1 + \exp^{-\mathbf{z}'_i}} + (1 - \mathbf{y}_i) \ln \frac{1}{1 + \exp^{\mathbf{z}'_i}} \right] \right| \\
&= \left| \sum_i^m \left[ \mathbf{y}_i \left( \ln \frac{1}{1 + \exp^{\mathbf{z}_i}} + \ln \frac{1}{1 + \exp^{-\mathbf{z}'_i}} \right. \right. \right. \\
&\quad \left. \left. - \ln \frac{1}{1 + \exp^{-\mathbf{z}_i}} - \ln \frac{1}{1 + \exp^{\mathbf{z}'_i}} \right) \right. \right. \\
&\quad \left. \left. + \ln \frac{1}{1 + \exp^{\mathbf{z}'_i}} - \ln \frac{1}{1 + \exp^{\mathbf{z}_i}} \right] \right| \\
&= \left| \sum_i^m \left[ \mathbf{y}_i \ln \frac{\exp^{\mathbf{z}'_i}}{\exp^{\mathbf{z}_i}} + \ln \frac{1}{1 + \exp^{\mathbf{z}'_i}} - \ln \frac{1}{1 + \exp^{\mathbf{z}_i}} \right] \right| \\
&= \left| \sum_i^m \left[ \mathbf{y}_i (\mathbf{z}'_i - \mathbf{z}_i) + \ln \frac{1 + \exp^{\mathbf{z}_i}}{1 + \exp^{\mathbf{z}'_i}} \right] \right| \\
&\leq \sum_i^m |\mathbf{y}_i (\mathbf{z}'_i - \mathbf{z}_i)| \\
&\quad + \sum_i^m \min \left( \left| \ln \frac{1 + \exp^{\mathbf{z}_i}}{1 + \exp^{\mathbf{z}'_i}} \right|, \left| \ln \frac{1 + \exp^{\mathbf{z}'_i}}{1 + \exp^{\mathbf{z}_i}} \right| \right) \\
&\leq \|\mathbf{z} - \mathbf{z}'\|_1 + \sum_i^m \min \left( \left| \ln \frac{1 + \exp^{\mathbf{z}_i}}{1 + \exp^{\mathbf{z}'_i}} \right|, \left| \ln \frac{1 + \exp^{\mathbf{z}'_i}}{1 + \exp^{\mathbf{z}_i}} \right| \right)
\end{aligned}$$

To bound this second component, notice that if  $\mathbf{z}'_i \leq \mathbf{z}_i$ ,

$$\frac{1 + \exp^{\mathbf{z}_i}}{1 + \exp^{\mathbf{z}'_i}} - \frac{\exp^{\mathbf{z}_i}}{\exp^{\mathbf{z}'_i}} = \frac{\exp^{\mathbf{z}'_i} - \exp^{\mathbf{z}_i}}{\exp^{\mathbf{z}'_i} (1 + \exp^{\mathbf{z}'_i})} \leq 0.$$

This implies

$$\begin{aligned}
\left| \ln \frac{1 + \exp^{\mathbf{z}_i}}{1 + \exp^{\mathbf{z}'_i}} \right| &= \ln \frac{1 + \exp^{\mathbf{z}_i}}{1 + \exp^{\mathbf{z}'_i}} \\
&\leq \ln \frac{\exp^{\mathbf{z}_i}}{\exp^{\mathbf{z}'_i}} = \left| \ln \frac{\exp^{\mathbf{z}_i}}{\exp^{\mathbf{z}'_i}} \right| = |\mathbf{z}_i - \mathbf{z}'_i|.
\end{aligned}$$

Therefore, we get

$$\begin{aligned}
|L_p(\mathbf{z}, \mathbf{y}) - L_p(\mathbf{z}', \mathbf{y})| &\leq \|\mathbf{z} - \mathbf{z}'\|_1 + \sum_i^m |\mathbf{z}_i - \mathbf{z}'_i| \\
&= 2 \|\mathbf{z} - \mathbf{z}'\|_1 \\
&\leq 2\sqrt{m} \|\mathbf{z} - \mathbf{z}'\|_2.
\end{aligned}$$

For  $\mathbf{y}_p \in \{-1, 1\}^m$ , similarly to the case where  $\{0, 1\}^m$ ,

$$\left| \ln \frac{1 + \exp^{\mathbf{y}_i \mathbf{z}'_i}}{1 + \exp^{\mathbf{y}_i \mathbf{z}_i}} \right| \leq |\mathbf{y}_i \mathbf{z}'_i - \mathbf{y}_i \mathbf{z}_i| \leq |\mathbf{z}'_i - \mathbf{z}_i|,$$

then we have

$$\begin{aligned}
& |L_p(\mathbf{z}, \mathbf{y}) - L_p(\mathbf{z}', \mathbf{y})| \\
&= \left| \sum_i^m \left[ \ln \frac{1}{1 + \exp^{\mathbf{y}_i \mathbf{z}_i}} - \ln \frac{1}{1 + \exp^{\mathbf{y}_i \mathbf{z}'_i}} \right] \right| \\
&= \left| \sum_i^m \left[ \frac{1 + \exp^{\mathbf{y}_i \mathbf{z}'_i}}{1 + \exp^{\mathbf{y}_i \mathbf{z}_i}} \right] \right| \\
&\leq \sum_i^m |(\mathbf{z}'_i - \mathbf{z}_i)| \\
&\leq \|\mathbf{z} - \mathbf{z}'\|_1 \\
&\leq \sqrt{m} \|\mathbf{z} - \mathbf{z}'\|_2
\end{aligned}$$

■
